# Supplementary material
Source: Royal Society of Chemistry journal article supplement (doi:10.1039/d5cp04677g)
Supplement: d5cp04677g1.pdf [file d5cp04677g1.pdf]

## Supplementary material

### NIR Excitation-Driven Conformational Isomerizations of Thymol and Carvacrol Isolated in a Nitrogen Cryomatrix

Leonardo J. Duarte,<sup>a,b,c\*</sup> Cláudio M. Nunes,<sup>c</sup> Ataulpa A. C. Braga,<sup>a</sup> R. Fausto<sup>c,d</sup> and A. J. Lopes Jesus<sup>e\*</sup>

<sup>a</sup> *Institute of Chemistry, Department of Fundamental Chemistry, University of São Paulo, 05508-900, São Paulo, Brazil*

<sup>b</sup> *Center for Natural and Human Sciences, Federal University of ABC, 09280-560, Santo André, SP, Brazil*

<sup>c</sup> *University of Coimbra, CQC-IMS, Department of Chemistry, 3004-535, Coimbra, Portugal*

<sup>d</sup> *Spectroscopy@IKU, Faculty Sciences and Letters, Department of Physics, Istanbul Kultur University, Bakirkoy, Istanbul 34158, Turkey*

<sup>e</sup> *University of Coimbra, CQC-IMS, Faculty of Pharmacy, 3004-295, Coimbra, Portugal*

#### Table of Contents:

---

|                       |    |
|-----------------------|----|
| 1. Figures            | S1 |
| 2. Tables             | S5 |
| 3. Computational Data | S9 |

## 1. Figures

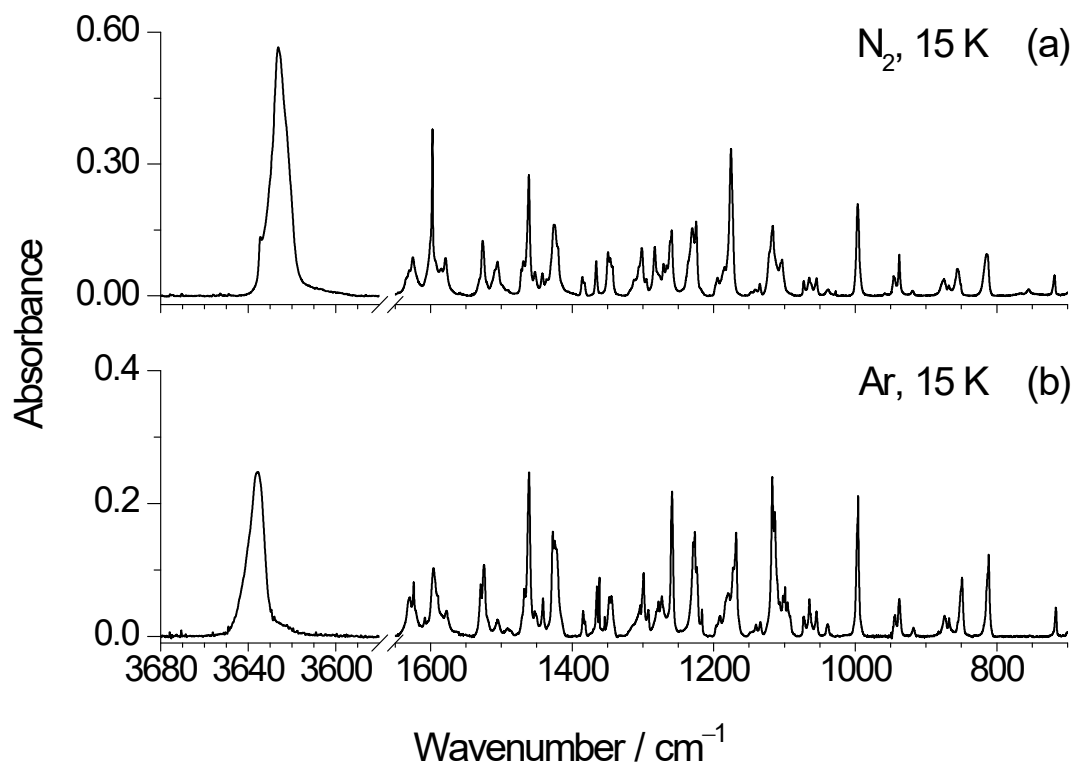

**Figure S1.** Mid-IR spectrum of carvacrol isolated in a (a)  $\text{N}_2$  matrix at 15 K compared with spectra recorded in Ar (b) at the same temperature, illustrating the influence of the matrix environment on the band's positions and profiles.

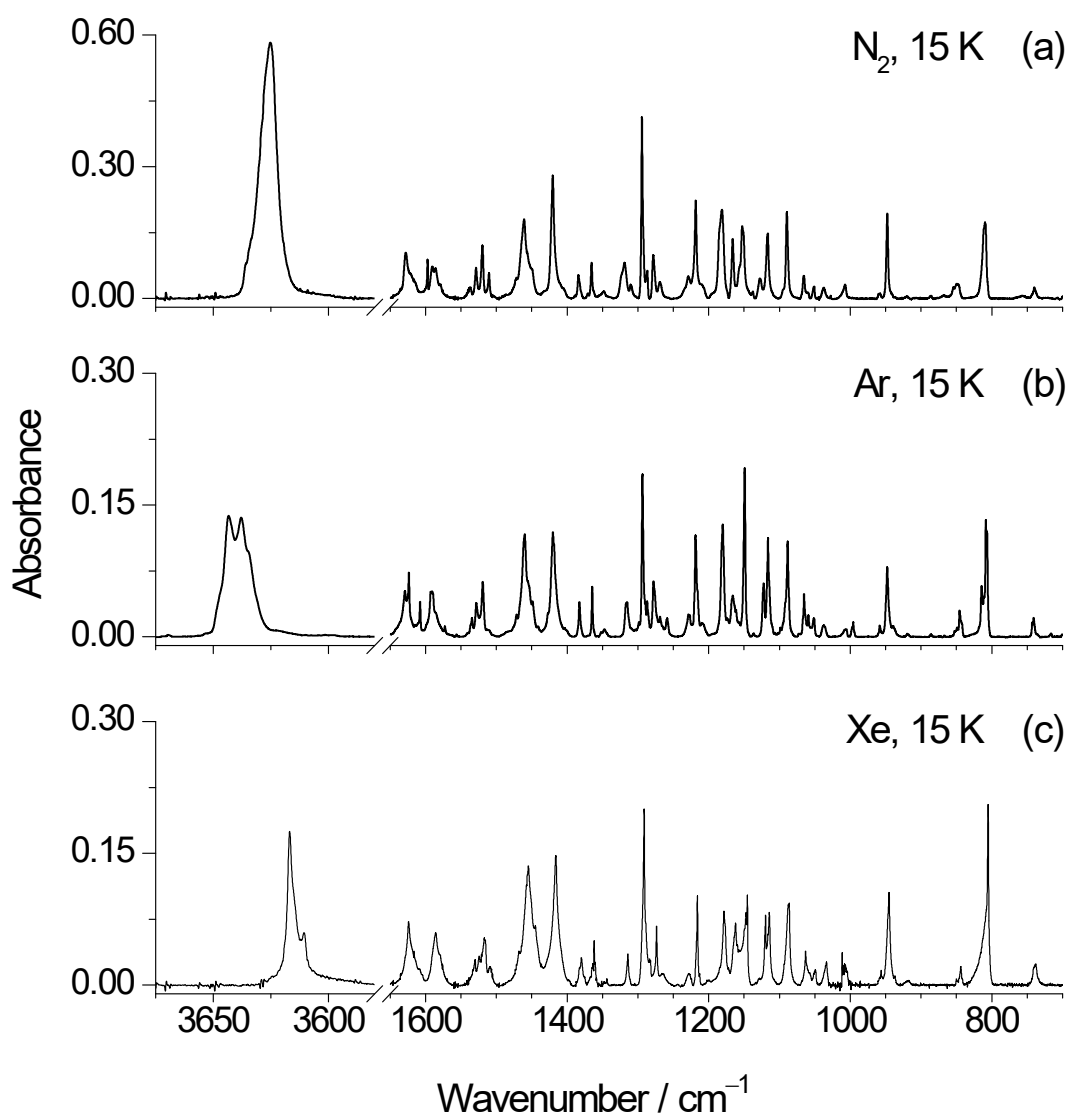

**Figure S2.** Mid-IR spectrum of thymol isolated in a (a)  $\text{N}_2$  matrix at 15 K compared with spectra recorded in Ar (b) and Xe (c) matrixes at the same temperature, illustrating the influence of the matrix environment on the band's positions and profiles.

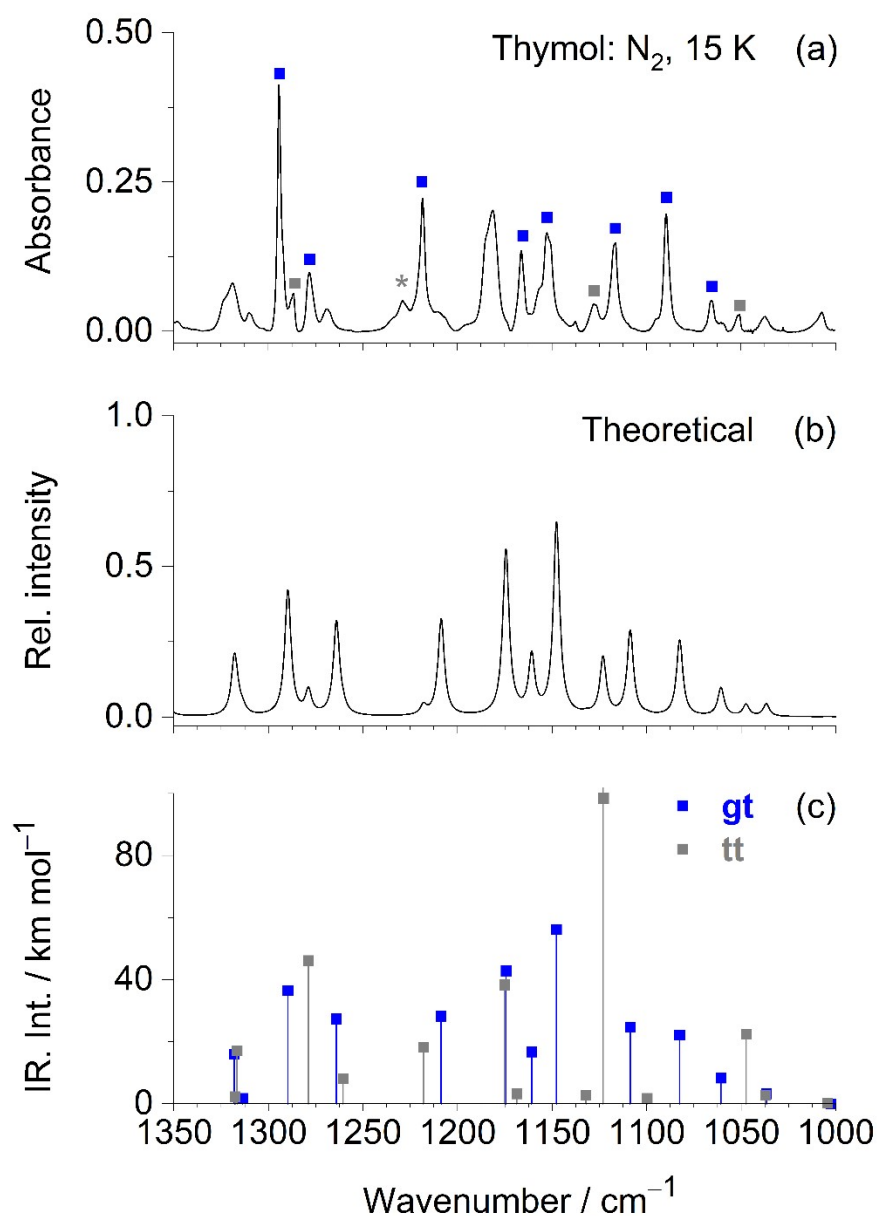

**Figure S3.** (a) Fragment of the experimental mid-IR spectrum of thymol isolated in a N<sub>2</sub> matrix at 15 K. Bands highlighted in the experimental spectrum with blue and grey squares and are assigned to the **gt** and **tt** conformers, respectively, by comparison with the computed vibrational data. The band at 1229 cm<sup>-1</sup>, marked with an asterisk, is tentatively attributed to the **tt** conformer, but it may also originate from the high-energy **cc** conformer, as demonstrated by the results of the NIR irradiation experiments discussed in section 3.2 of the manuscript. (b) Theoretical spectrum of a mixture of the **gt** and **tt** conformers, which was simulated from the B3LYP/6-311++G(d,p) vibrational calculations carried out for both conformers. Lorentzian functions (FWHM = 4 cm<sup>-1</sup>) centred at the calculated wavenumbers were used and the intensities were scaled by 1.0 (**gt**) and 0.15 (**tt**) to best match the experimental spectrum. (c) Scaled wavenumbers and unscaled IR intensities extracted from the harmonic vibrational calculations performed for the **gt** (blue) and **tt** (purple) conformers.

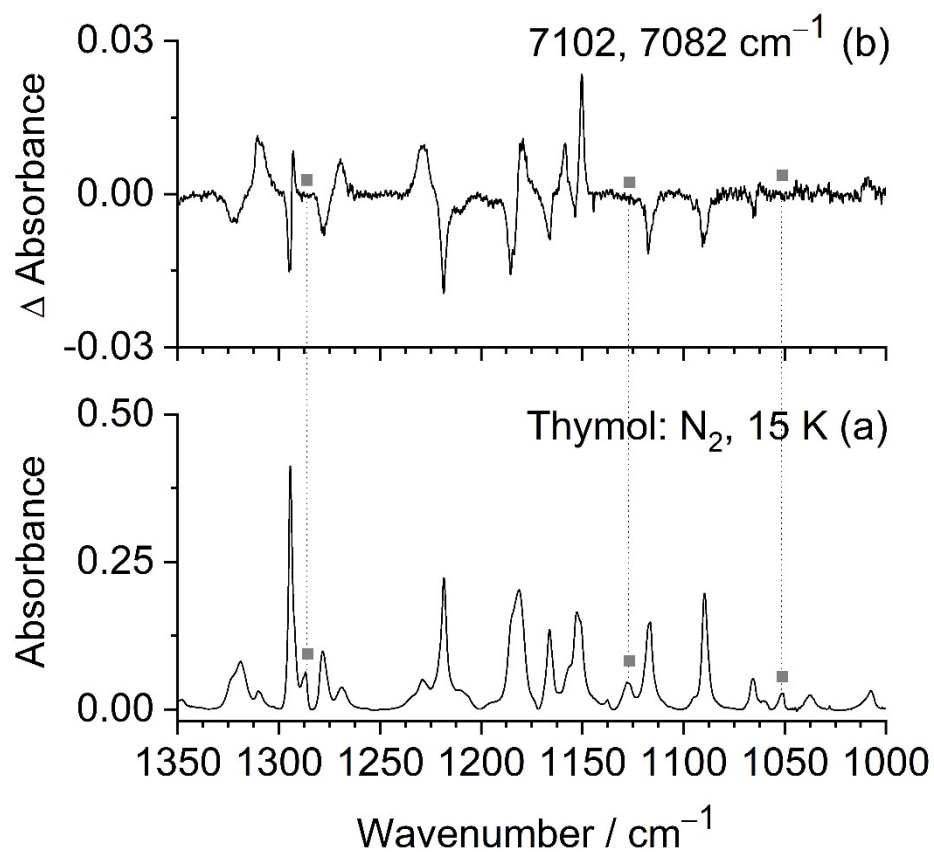

**Figure S4.** Spectral indication of the absence of changes in the population of the **tt** conformer of thymol following NIR irradiations at 7102 or 7082  $\text{cm}^{-1}$ . (a) Fragment of the experimental mid-IR spectrum of thymol isolated in a  $\text{N}_2$  matrix at 15 K. Bands marked with purple circles are tentatively assigned to the **tt** conformer (see Figure S3). (b) Difference spectrum obtained after 40 min of NIR irradiation at 7102 or 7082  $\text{cm}^{-1}$  (positive bands correspond to conformer formation), showing that the bands assigned to the **tt** conformer are not affected.

## 2. Tables

**Table S1.** Experimental (N<sub>2</sub>, 15 K) and calculated [B3LYP/6-311++G(d,p)] infrared absorptions for the **gt** conformer of thymol (2-isopropyl-5-methylphenol).

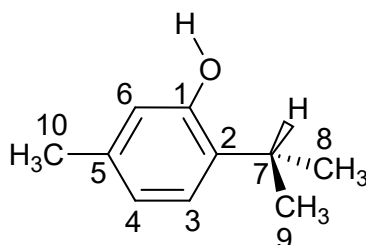

| Exp. <sup>a</sup> | Calc. ( <b>gt</b> ) <sup>b</sup> |                 | Approximate description <sup>c</sup>                                                                       |
|-------------------|----------------------------------|-----------------|------------------------------------------------------------------------------------------------------------|
|                   | $\nu$ <sup>b</sup>               | $A^{\text{th}}$ |                                                                                                            |
| 3625              | 3626.3                           | 56.5            | $\nu(\text{OH})$                                                                                           |
| 1628              | 1623.8                           | 34.9            | $\nu(\text{CC})_{\text{ph}}$                                                                               |
| 1588              | 1584.8                           | 20.6            | $\nu(\text{CC})_{\text{ph}}$                                                                               |
| 1520              | 1518.2                           | 24.7            | $\nu(\text{CC})_{\text{ph}}$ ; $\delta(\text{CH})_{\text{ph}}$                                             |
| 1461              | 1467.7                           | 24.8            | $\delta(\text{CH}_3)_{\text{as}}$                                                                          |
| 1421              | 1417.0                           | 54.5            | $\delta(\text{CH})_{\text{ph}}$ ; $\nu(\text{CC})_{\text{R}}$ ; $\nu(\text{CO})$                           |
| 1384              | 1387.4                           | 3.8             | $\delta(\text{CH}_3)_{\text{iso,s}}$ (+)                                                                   |
| 1366              | 1367.4                           | 6.8             | $\delta(\text{CH}_3)_{\text{iso,s}}$ (-)                                                                   |
| 1349              | 1355.1                           | 6.8             | $\delta(\text{C}_7\text{H})$                                                                               |
| 1323              | 1318.0                           | 16.0            | $\nu(\text{CC})_{\text{ph}}$ ; $\delta(\text{OH})$                                                         |
| 1295              | 1289.8                           | 36.5            | $\nu(\text{CC})_{\text{ph}}$ ; $\delta(\text{CH})_{\text{ph}}$                                             |
| 1278              | 1264.0                           | 27.4            | $\nu(\text{CO}) + \nu(\text{C}_2\text{C}_7) + \nu(\text{C}_5\text{C}_{10})$ ; $\nu(\text{CC})_{\text{ph}}$ |
| 1217              | 1208.7                           | 28.2            | $\nu(\text{C}_2\text{C}_7)$                                                                                |
| 1185              | 1174.4                           | 42.8            | $\delta(\text{OH})$ ; $\delta(\text{CH})_{\text{ph}}$                                                      |
| 1166              | 1160.8                           | 16.7            | $\nu(\text{CO}) - \nu(\text{C}_5\text{C}_{10})$ ; $\delta(\text{CH})_{\text{ph}}$                          |
| 1154              | 1147.7                           | 56.1            | $\delta(\text{OH})$ ; $\delta(\text{CH})_{\text{ph}}$ ; $\nu(\text{CC})_{\text{ph}}$                       |
| 1117              | 1108.7                           | 24.8            | $\nu(\text{C}_7\text{C}_8) - \nu(\text{C}_7\text{C}_9)$                                                    |
| 1090              | 1082.6                           | 22.1            | $\delta(\text{CCC})_{\text{ph}}$                                                                           |
| 1065              | 1060.7                           | 8.3             | $\rho(\text{CH}_3)_{\text{iso}}$ (+)                                                                       |
| 948               | 939.6                            | 16.0            | $\delta(\text{CCC})_{\text{ph}}$ ; $\nu(\text{CO}) - \nu(\text{C}_5\text{C}_{10})$                         |
| 853               | 831.6                            | 7.0             | $\gamma(\text{CH})_{\text{ph}}$                                                                            |
| 811               | 805.0                            | 34.5            | $\gamma(\text{CH})_{\text{ph}}$                                                                            |

<sup>a</sup> Experimental wavenumbers correspond to the positions of the minima (for decreasing bands) or maxima (for increasing bands) observed upon NIR irradiations at 7102/7082 or 7072/7062 cm<sup>-1</sup>, respectively. <sup>b</sup> Calculated harmonic wavenumbers were multiplied by 0.945 or 0.980, for the regions above or below 2000 cm<sup>-1</sup>, respectively. Calculated vibrations with very low intensity or without a corresponding feature in the experimental difference spectra are not shown. <sup>c</sup> Abbreviations:  $\nu$ , stretching;  $\delta$ , in-plane bending;  $\gamma$ , out-of-plane bending; iso, isopropyl group; ph, phenyl ring; as, antisymmetric; s, symmetric. Signs “+” and “-” designate combination of vibrations occurring in the same phase and in the opposite phase, respectively.

**Table S2.** Experimental ( $N_2$ , 15 K) and calculated [B3LYP/6-311++G(d,p)] infrared absorptions for the **gc** conformer of thymol (2-isopropyl-5-methylphenol).

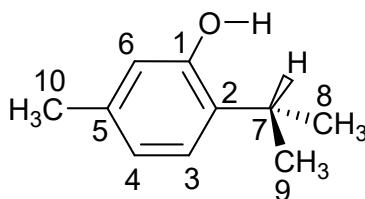

| Exp. <sup>a</sup> | Calc. ( <b>gc</b> ) <sup>b</sup> |                 | Approximate description <sup>c</sup>                                                                    |
|-------------------|----------------------------------|-----------------|---------------------------------------------------------------------------------------------------------|
|                   | $\nu$ <sup>b</sup>               | $A^{\text{th}}$ |                                                                                                         |
| 3631              | 3626.0                           | 62.4            | $\nu(\text{OH})$                                                                                        |
| 1634              | 1630.8                           | 32.1            | $\nu(\text{CC})_{\text{ph}}$                                                                            |
| 1579              | 1577.5                           | 37.1            | $\nu(\text{CC})_{\text{ph}}$                                                                            |
| 1511              | 1507.1                           | 54.9            | $\nu(\text{CC})_{\text{ph}}; \delta(\text{CH})_{\text{R}}$                                              |
| 1468              | 1468.9                           | 19.7            | $\delta(\text{CH}_3)_{\text{as}}$                                                                       |
| 1454              | 1463.3                           | 18.2            | $\delta(\text{CH}_3)_{\text{iso,as}} (-)$                                                               |
|                   | 1458.3                           | 7.8             | $\delta(\text{CH}_3)_{\text{as}'}$                                                                      |
| 1432              | 1427.7                           | 15.8            | $\delta(\text{CH})_{\text{R}}; \nu(\text{CC})_{\text{R}}; \nu(\text{CO})$                               |
| 1389              | 1392.8                           | 5.3             | $\delta(\text{CH}_3)_{\text{iso,s}} (+)$                                                                |
| 1371              | 1372.1                           | 6.9             | $\delta(\text{CH}_3)_{\text{iso,s}} (-)$                                                                |
| 1310              | 1310.4                           | 40.1            | $\nu(\text{CC})_{\text{ph}}; \delta(\text{OH})$                                                         |
| 1294              | 1288.3                           | 29.8            | $\nu(\text{CC})_{\text{ph}}; \nu(\text{CO}); \delta(\text{CH})_{\text{ph}}$                             |
| 1269              | 1256.7                           | 42.2            | $\nu(\text{CO}) + \nu(\text{C}_2\text{C}_7) + \nu(\text{C}_5\text{C}_{10}); \nu(\text{CC})_{\text{ph}}$ |
| 1228              | 1220.7                           | 38.0            | $\delta(\text{OH}); \nu(\text{C}_2\text{C}_7) - \nu(\text{C}_5\text{C}_{10})$                           |
| 1180              | 1174.7                           | 42.3            | $\delta(\text{CH})_{\text{ph}}; \delta(\text{OH})$                                                      |
| 1159              | 1153.5                           | 15.5            | $\delta(\text{CH})_{\text{ph}}; \nu(\text{CO}); \delta(\text{C}_8\text{C}_7\text{C}_9)$                 |
| 1150              | 1148.2                           | 47.7            | $\delta(\text{CH})_{\text{ph}}; \delta(\text{OH})$                                                      |
| 1062              | 1057.4                           | 3.0             | $\rho(\text{CH}_3)_{\text{iso}} (+)$                                                                    |
| 1044              | 1037.4                           | 5.0             | $\rho(\text{CH}_3)$                                                                                     |
| 1009              | 1002.5                           | 8.2             | $\rho(\text{CH}_3)'$                                                                                    |
| 949               | 940.4                            | 28.0            | $\delta(\text{CCC})_{\text{ph}}$                                                                        |
| 870               | 867.6                            | 9.4             | $\gamma(\text{CH})_{\text{ph}}$                                                                         |
| 807               | 801.6                            | 27.7            | $\gamma(\text{CH})_{\text{ph}}$                                                                         |

<sup>a</sup> Experimental wavenumbers correspond to the positions of the minima (for decreasing bands) or maxima (for increasing bands) observed upon NIR irradiations at 7072/7062 or 7102/7082  $\text{cm}^{-1}$ , respectively. <sup>b</sup> Calculated harmonic wavenumbers were multiplied by 0.945 or 0.980, for the regions above or below 2000  $\text{cm}^{-1}$ , respectively. Calculated vibrations with very low intensity or without a corresponding feature in the experimental difference spectra are not shown. <sup>c</sup> Abbreviations:  $\nu$ , stretching;  $\delta$ , in-plane bending;  $\gamma$ , out-of-plane bending; iso, isopropyl group; ph, phenyl ring; as, antisymmetric; s, symmetric. Signs “+” and “-” designate combination of vibrations occurring in the same phase and in the opposite phase, respectively. The prime symbol (') is used to distinguish between different types of antisymmetric in-plane bending and rocking vibrations of the  $\text{CH}_3$  group.

**Table S3.** Experimental ( $N_2$ , 15 K) and calculated [B3LYP/6-311++G(d,p)] infrared absorptions for the **tt** and **ct** conformers of carvacrol (5-isopropyl-2-methylphenol).

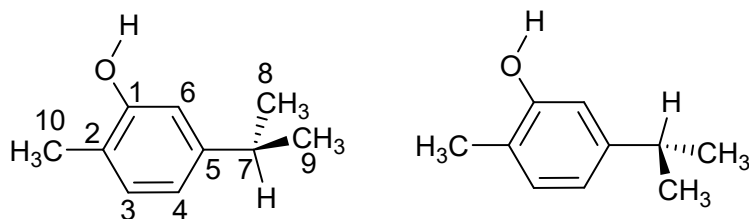

| Exp. <sup>a</sup> | Calc. ( <b>tt</b> ) <sup>b</sup> |                 | Calc. ( <b>ct</b> ) <sup>b</sup> |                 | Approximate description <sup>c</sup>                                                                    |
|-------------------|----------------------------------|-----------------|----------------------------------|-----------------|---------------------------------------------------------------------------------------------------------|
|                   | $\nu$ <sup>b</sup>               | $A^{\text{th}}$ | $\nu$ <sup>b</sup>               | $A^{\text{th}}$ |                                                                                                         |
| 3628              | 3625.5                           | 52.1            | 3625.1                           | 55.4            | $\nu(\text{OH})$                                                                                        |
| 1625              | 1623.6                           | 27.9            | 1623.6                           | 28.9            | $\nu(\text{CC})_{\text{ph}}$                                                                            |
| 1598*             | 1587.4                           | 36.7            | 1588.4                           | 39.8            | $\nu(\text{CC})_{\text{ph}}$                                                                            |
| 1527              | 1516.9                           | 29.0            | 1517.5                           | 28.5            | $\nu(\text{CC})_{\text{ph}}; \delta(\text{CH})_{\text{ph}}$                                             |
| 1470              | 1477.8                           | 3.3             | 1478.1                           | 8.5             | $\delta(\text{CH}_3)_{\text{iso,as}} (+)$                                                               |
| 1462              | 1467.7                           | 25.8            | 1467.9                           | 24.7            | $\delta(\text{CH}_3)_{\text{as}}$                                                                       |
| 1443              | 1449.3                           | 7.1             | 1449.9                           | 7.1             | $\delta(\text{CH}_3)_{\text{as}'}$                                                                      |
| 1426/1420         | 1421.8                           | 58.1            | 1421.1                           | 56.7            | $\delta(\text{CH})_{\text{ph}}; \nu(\text{CC})_{\text{R}}; \nu(\text{CO})$                              |
| 1384              | 1390.2                           | 2.2             | 1390.5                           | 2.5             | $\delta(\text{CH}_3)_{\text{iso,s}} (+)$                                                                |
| 1365              | 1370.6                           | 6.8             | 1369.3                           | 6.5             | $\delta(\text{CH}_3)_{\text{iso,s}} (-)$                                                                |
| 1350              | 1351.7                           | 28.6            | 1346.9                           | 9.2             | $\delta(\text{C}_7\text{H})$                                                                            |
| 1302/1296         | 1304.8                           | 10.2            | 1301.0                           | 7.6             | $\nu(\text{CC})_{\text{ph}}; \delta(\text{CH})_{\text{R}}$                                              |
|                   | 1291.8                           | 3.2             | 1288.4                           | 24.7            | $\delta(\text{CH})_{\text{ph}}; \delta(\text{OH})$                                                      |
| 1279/1260         | 1255.7                           | 71.4            | 1266.7                           | 56.5            | $\nu(\text{CO}) + \nu(\text{C}_5\text{C}_7); \delta(\text{CH})_{\text{ph}}; \delta(\text{C}_7\text{H})$ |
| 1230              | 1211.8                           | 36.4            | 1217.4                           | 51.6            | $\delta(\text{OH}); \nu(\text{C}_2\text{C}_{10})$                                                       |
| 1195/1187         | 1178.8                           | 10.5            | 1176.4                           | 4.8             | $\delta(\text{OH}); \delta(\text{CH})_{\text{ph}}; \nu(\text{C}_5\text{C}_7)$                           |
| 1175**            | 1168.9                           | 26.6            | 1169.6                           | 34.3            | $\delta(\text{CH})_{\text{ph}}; \delta(\text{OH})$                                                      |
| 1117/1104         | 1115.3                           | 89.6            | 1104.4                           | 89.1            | $\delta(\text{CH})_{\text{ph}}; \delta(\text{OH}); \nu(\text{CC})_{\text{ph}}$                          |
| 1067/1058         | 1060.8                           | 19.5            | 1051.9                           | 12.4            | $\rho(\text{CH}_3)_{\text{iso}} (+)$                                                                    |
| 998               | 994.8                            | 22.8            | 993.5                            | 29.1            | $\rho(\text{CH}_3)$                                                                                     |
| 857               | 838.5                            | 20.7            | 837.4                            | 20.4            | $\gamma(\text{CH})_{\text{R}}; \gamma(\text{C})_{\text{ph}}$                                            |
| 818               | 810.4                            | 17.0            | 807.9                            | 16.1            | $\gamma(\text{CH})_{\text{ph}}$                                                                         |
| 719               | 705.3                            | 4.2             | 705.0                            | 4.6             | $\gamma(\text{C})_{\text{ph}}$                                                                          |
| 698               | 688.4                            | 3.8             | 688.0                            | 2.2             | $\delta(\text{CCC})_{\text{ph}}$                                                                        |
| 646               | 641.7                            | 11.0            | 640.4                            | 10.9            | $\gamma(\text{C})_{\text{ph}}$                                                                          |

<sup>a</sup> Experimental wavenumbers correspond to the positions of the minima (for decreasing bands) or maxima (for increasing bands) observed upon NIR irradiations at 7090/7083 or 7072  $\text{cm}^{-1}$ , respectively. Band at 1598  $\text{cm}^{-1}$  is partially due to monomeric water. The band at 1175  $\text{cm}^{-1}$  has a major contribution from the **tc** and **cc** conformers, as evidenced by the NIR irradiation results (see Figure 8 of the manuscript), but it is also expected to include partial contributions from the **tt** and **ct** conformers (see Figure 4 of the manuscript).

<sup>b</sup> Calculated harmonic wavenumbers were multiplied by 0.945 or 0.980, for the regions above or below 2000  $\text{cm}^{-1}$ , respectively. Calculated vibrations with very low intensity or without a corresponding feature in the experimental difference spectra are not shown. <sup>c</sup> Abbreviations:  $\nu$ , stretching;  $\delta$ , in-plane bending;  $\gamma$ , out-of-plane bending; iso, isopropyl group; ph, phenyl ring; as, antisymmetric; s, symmetric. Signs “+” and “-” designate combination of vibrations occurring in the same phase and in the opposite phase, respectively. The prime symbol (') is used to distinguish between different types of antisymmetric in-plane bending and rocking vibrations of the  $\text{CH}_3$  group.

**Table S4.** Experimental ( $N_2$ , 15 K) and calculated [B3LYP/6-311++G(d,p)] infrared absorptions for the **tc** and **cc** conformers of carvacrol.

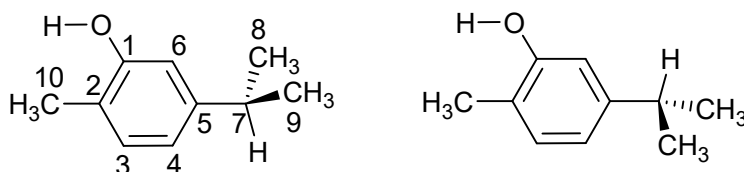

| Exp. <sup>a</sup> | Calc. ( <b>tc</b> ) <sup>b</sup> |                 | Calc. ( <b>cc</b> ) <sup>b</sup> |                 | Approximate description <sup>c</sup>                                                                          |
|-------------------|----------------------------------|-----------------|----------------------------------|-----------------|---------------------------------------------------------------------------------------------------------------|
|                   | $\nu$ <sup>b</sup>               | $A^{\text{th}}$ | $\nu$ <sup>b</sup>               | $A^{\text{th}}$ |                                                                                                               |
| 3631              | 3632.9                           | 66.3            | 3629.6                           | 65.8            | $\nu(\text{OH})$                                                                                              |
| 1635              | 1631.0                           | 24.6            | 1630.8                           | 25.5            | $\nu(\text{CC})_{\text{ph}}$                                                                                  |
| 1578              | 1579.2                           | 58.1            | 1580.0                           | 62.4            | $\nu(\text{CC})_{\text{ph}}$                                                                                  |
| 1507 (split)      | 1506.1                           | 60.6            | 1507.3                           | 55.6            | $\nu(\text{CC})_{\text{ph}}$ ; $\delta(\text{CH})_{\text{ph}}$                                                |
| 1472              | 1477.8                           | 6.7             | 1478.4                           | 16.2            | $\delta(\text{CH}_3)_{\text{as}}$ ; $\delta(\text{CH}_3)_{\text{iso,as}}$ (+)                                 |
| 1468              | 1472.4                           | 13.7            | 1471.5                           | 13.8            | $\delta(\text{CH}_3)_{\text{iso,as}}$ (+)                                                                     |
| 1457              | 1460.9                           | 2.8             | 1460.2                           | 5.2             | $\delta(\text{CH}_3)_{\text{iso,as}}$ (-)                                                                     |
|                   | 1459.3                           | 7.7             | 1459.8                           | 5.3             | $\delta(\text{CH}_3)_{\text{as}}$                                                                             |
| 1436              | 1433.6                           | 28.0            | 1433.2                           | 25.6            | $\delta(\text{CH})_{\text{ph}}$ ; $\nu(\text{CO})$ ; $\delta(\text{C}_7\text{H})$                             |
| 1346              | 1354.3                           | 6.6             | 1348.9                           | 29.9            | $\delta(\text{C}_7\text{H})$ ; $\delta(\text{OH})$                                                            |
| 1314/1305         | 1306.4                           | 39.9            | 1298.3                           | 5.6             | $\nu(\text{CC})_{\text{ph}}$ ; $\delta(\text{CH})_{\text{ph}}$                                                |
| 1286              | 1278.2                           | 57.7            | 1285.4                           | 5.7             | $\delta(\text{CH})_{\text{ph}}$ ; $\delta(\text{OH})$                                                         |
| 1271              | 1257.6                           | 17.1            | 1262.8                           | 64.9            | $\nu(\text{CO}) + \nu(\text{C}_5\text{C}_7) + \nu(\text{C}_2\text{C}_{10})$ ; $\delta(\text{CH})_{\text{ph}}$ |
| 1237              | 1217.3                           | 53.5            | 1223.1                           | 64.5            | $\nu(\text{C}_5\text{C}_7) - \nu(\text{C}_2\text{C}_{10})$ ; $\delta(\text{OH})$                              |
| 1175* (split)     | 1167.6                           | 90.6            | 1167.4                           | 73.8            | $\delta(\text{CH})_{\text{ph}}$ ; $\delta(\text{OH})$                                                         |
| 1147              | –                                | –               | 1143.7                           | 17.6            | $\delta(\text{CH})_{\text{ph}}$ ; $\delta(\text{OH})$                                                         |
| 993               | 987.2                            | 26.8            | 986.4                            | 34.0            | $\rho(\text{CH}_3)$                                                                                           |
| 878               | 873.7                            | 14.3            | 870.8                            | 14.1            | $\gamma(\text{CH})_{\text{ph}}$ ; $\gamma(\text{C})_{\text{R}}$                                               |
| 813               | 806.8                            | 21.9            | 803.9                            | 21.2            | $\gamma(\text{CH})_{\text{ph}}$                                                                               |

<sup>a</sup> Experimental wavenumbers correspond to the positions of the minima (for decreasing bands) or maxima (for increasing bands) observed upon NIR irradiations at 7072 or 7090/7083  $\text{cm}^{-1}$ , respectively. The band at 1175  $\text{cm}^{-1}$  has a major contribution from the **tc** and **cc** conformers, as evidenced by the NIR irradiation results (see Figure 8 of the manuscript), but it is also expected to include partial contributions from the **tt** and **ct** conformers (see Figure 4 of the manuscript). <sup>b</sup> Calculated harmonic wavenumbers were multiplied by 0.945 or 0.980, for the regions above or below 2000  $\text{cm}^{-1}$ , respectively. Calculated vibrations with very low intensity or without a corresponding feature in the experimental difference spectra are not shown. <sup>c</sup> Abbreviations:  $\nu$ , stretching;  $\delta$ , in-plane bending;  $\gamma$ , out-of-plane bending; iso, isopropyl group; R, phenyl ring; as, antisymmetric; s, symmetric. Signs “+” and “–” designate combination of vibrations occurring in the same phase and in the opposite phase, respectively. The prime symbol (') is used to distinguish between different types of antisymmetric in-plane bending and rocking vibrations of the  $\text{CH}_3$  group.

### 3. Computational data

The optimized structures of each conformer of Thymol and Carvacrol are found below. The data was obtained at the B3LYP/6-311++g(2d,2p).

#### 3.1 – Thymol

Optimized Structures:

| GC = -464.8778758 Hartree |          |          |          | TC = -464.8763597 Hartree |          |          |          |
|---------------------------|----------|----------|----------|---------------------------|----------|----------|----------|
| C                         | 0.09305  | -1.33237 | 0.04382  | C                         | 1.72964  | -1.34802 | 0.01109  |
| C                         | -0.58072 | -0.12201 | -0.12296 | C                         | 0.34910  | -1.49725 | 0.01908  |
| C                         | 0.21248  | 1.03387  | -0.20518 | C                         | -0.52710 | -0.40926 | 0.00453  |
| C                         | 1.59982  | 0.96880  | -0.12676 | C                         | 0.05985  | 0.86566  | -0.02075 |
| C                         | 2.25412  | -0.24715 | 0.04771  | C                         | 1.44332  | 1.02273  | -0.02881 |
| H                         | -0.47543 | -2.24957 | 0.10336  | C                         | 2.29849  | -0.07435 | -0.01026 |
| H                         | 2.15754  | 1.89254  | -0.20656 | H                         | 2.36430  | -2.22426 | 0.01889  |
| C                         | 3.75672  | -0.30143 | 0.16477  | H                         | -0.07128 | -2.49530 | 0.03385  |
| H                         | 4.23426  | 0.42254  | -0.49552 | H                         | 1.83648  | 2.03056  | -0.05255 |
| H                         | 4.07867  | -0.07362 | 1.18372  | C                         | 3.79440  | 0.11581  | 0.01240  |
| H                         | 4.13722  | -1.29103 | -0.08538 | H                         | 4.09295  | 0.99561  | -0.55725 |
| C                         | -2.09956 | -0.02913 | -0.17929 | H                         | 4.15623  | 0.25136  | 1.03446  |
| H                         | -2.36102 | 0.76205  | -0.89445 | H                         | 4.30929  | -0.74917 | -0.40433 |
| C                         | -2.68388 | 0.36893  | 1.19115  | C                         | -2.03047 | -0.66047 | 0.01166  |
| H                         | -3.76347 | 0.51580  | 1.12706  | H                         | -2.14050 | -1.74645 | 0.03271  |
| H                         | -2.49150 | -0.41652 | 1.92322  | C                         | -2.73734 | -0.18739 | -1.27331 |
| H                         | -2.23742 | 1.28736  | 1.57313  | H                         | -3.78397 | -0.49538 | -1.26469 |
| C                         | -2.78159 | -1.29805 | -0.70541 | H                         | -2.72370 | 0.89758  | -1.39797 |
| H                         | -3.85054 | -1.12271 | -0.83023 | H                         | -2.26346 | -0.61589 | -2.15585 |
| H                         | -2.37232 | -1.60300 | -1.66820 | C                         | -2.73273 | -0.13805 | 1.27989  |
| H                         | -2.67011 | -2.13096 | -0.01042 | H                         | -3.77972 | -0.44487 | 1.28629  |
| O                         | -0.32030 | 2.28922  | -0.36682 | H                         | -2.25652 | -0.53343 | 2.17653  |
| H                         | -1.27388 | 2.23008  | -0.46937 | H                         | -2.71699 | 0.95079  | 1.36300  |
| C                         | 1.47846  | -1.40332 | 0.13020  | O                         | -0.66439 | 2.03291  | -0.04230 |
| H                         | 1.95693  | -2.36564 | 0.25582  | H                         | -1.60383 | 1.83891  | -0.04231 |
| GT = -464.8790281 Hartree |          |          |          | TT = -464.8783827 Hartree |          |          |          |
| C                         | 1.47172  | -1.41170 | 0.14666  | C                         | -1.72774 | -1.35483 | -0.01100 |
| C                         | 0.08305  | -1.33959 | 0.05676  | C                         | -0.34427 | -1.51125 | -0.01234 |
| C                         | -0.59014 | -0.13353 | -0.11666 | C                         | 0.53719  | -0.43215 | -0.00112 |
| C                         | 0.20412  | 1.02077  | -0.19869 | C                         | -0.04422 | 0.84568  | 0.01167  |
| C                         | 1.59001  | 0.95747  | -0.11547 | C                         | -1.42520 | 1.01110  | 0.01314  |
| C                         | 2.24842  | -0.26069 | 0.05990  | C                         | -2.29122 | -0.08280 | 0.00217  |
| H                         | 1.94917  | -2.37324 | 0.28110  | H                         | -2.36664 | -2.22782 | -0.02046 |
| H                         | -0.48637 | -2.25599 | 0.12059  | H                         | 0.07035  | -2.51153 | -0.02286 |
| H                         | 2.16571  | 1.87468  | -0.18797 | H                         | -1.83228 | 2.01733  | 0.02282  |
| C                         | 3.75325  | -0.31271 | 0.14452  | C                         | -3.78525 | 0.12237  | 0.00736  |
| H                         | 4.21520  | 0.03805  | -0.78057 | H                         | -4.11099 | 0.64474  | 0.90906  |

|   |          |          |          |   |          |          |          |
|---|----------|----------|----------|---|----------|----------|----------|
| H | 4.12823  | 0.31817  | 0.95252  | H | -4.10746 | 0.72043  | -0.84707 |
| H | 4.10137  | -1.32836 | 0.32534  | H | -4.31224 | -0.82943 | -0.03417 |
| C | -2.10510 | -0.02187 | -0.18829 | C | 2.03920  | -0.67251 | -0.00363 |
| H | -2.32731 | 0.78598  | -0.88800 | H | 2.16085  | -1.75861 | -0.01438 |
| C | -2.68883 | 0.38805  | 1.17739  | C | 2.72765  | -0.15873 | 1.27307  |
| H | -3.76816 | 0.53455  | 1.10587  | H | 3.78173  | -0.44197 | 1.27149  |
| H | -2.50176 | -0.38654 | 1.92355  | H | 2.66872  | 0.92568  | 1.34582  |
| H | -2.24444 | 1.31633  | 1.53319  | H | 2.26636  | -0.58476 | 2.16467  |
| C | -2.79273 | -1.28745 | -0.71298 | C | 2.72744  | -0.13358 | -1.27004 |
| H | -3.85875 | -1.10124 | -0.84844 | H | 3.78154  | -0.41673 | -1.27421 |
| H | -2.38094 | -1.60074 | -1.67275 | H | 2.26604  | -0.54196 | -2.16981 |
| H | -2.69858 | -2.12217 | -0.01640 | H | 2.66843  | 0.95205  | -1.32136 |
| O | -0.44302 | 2.22265  | -0.36681 | O | 0.79053  | 1.93900  | 0.02240  |
| H | 0.20821  | 2.92678  | -0.43234 | H | 0.25989  | 2.74082  | 0.03052  |

Transition States:

| GC-TC = -464.8682288 Hartree |          |          |          | GT-GC = -464.8733043 Hartree |          |          |          |
|------------------------------|----------|----------|----------|------------------------------|----------|----------|----------|
| C                            | 1.60339  | -1.36849 | -0.11048 | C                            | -1.42630 | -1.40551 | 0.15393  |
| C                            | 0.22177  | -1.37282 | -0.20394 | C                            | -0.04384 | -1.29041 | 0.11780  |
| C                            | -0.56314 | -0.20879 | -0.16843 | C                            | 0.59541  | -0.05503 | -0.02518 |
| C                            | 0.15647  | 0.99503  | -0.05268 | C                            | -0.22934 | 1.07023  | -0.11927 |
| C                            | 1.54998  | 1.00141  | 0.05497  | C                            | -1.61685 | 0.95946  | -0.09554 |
| C                            | 2.29682  | -0.16516 | 0.03131  | C                            | -2.24114 | -0.27725 | 0.04066  |
| H                            | 2.14289  | -2.30589 | -0.14855 | H                            | -1.87726 | -2.38310 | 0.26821  |
| H                            | -0.26637 | -2.32826 | -0.31861 | H                            | 0.55558  | -2.18739 | 0.20343  |
| H                            | 2.03191  | 1.96540  | 0.14909  | H                            | -2.20193 | 1.86484  | -0.19117 |
| C                            | 3.79744  | -0.13683 | 0.17074  | C                            | -3.74463 | -0.39593 | 0.03562  |
| H                            | 4.27169  | -0.83838 | -0.51630 | H                            | -4.11693 | -0.62062 | -0.96678 |
| H                            | 4.19717  | 0.85631  | -0.02935 | H                            | -4.08133 | -1.19692 | 0.69375  |
| H                            | 4.10205  | -0.41789 | 1.18157  | H                            | -4.21827 | 0.53009  | 0.35967  |
| C                            | -2.09021 | -0.34622 | -0.33716 | C                            | 2.11082  | 0.05616  | -0.06309 |
| H                            | -2.28000 | -0.45078 | -1.41126 | H                            | 2.34533  | 1.09503  | -0.29163 |
| C                            | -2.95246 | 0.83887  | 0.14541  | C                            | 2.72623  | -0.80639 | -1.17661 |
| H                            | -4.00183 | 0.54522  | 0.15038  | H                            | 3.80568  | -0.65356 | -1.22266 |
| H                            | -2.70095 | 1.14370  | 1.16287  | H                            | 2.55146  | -1.86988 | -1.00617 |
| H                            | -2.90672 | 1.70570  | -0.51950 | H                            | 2.30629  | -0.55051 | -2.14927 |
| C                            | -2.63828 | -1.61785 | 0.34008  | C                            | 2.73625  | -0.27722 | 1.30261  |
| H                            | -3.71676 | -1.67855 | 0.19143  | H                            | 3.81852  | -0.13963 | 1.27389  |
| H                            | -2.20987 | -2.53202 | -0.06209 | H                            | 2.33550  | 0.36155  | 2.09069  |
| H                            | -2.44461 | -1.60027 | 1.41392  | H                            | 2.53918  | -1.31264 | 1.58582  |
| O                            | -0.39623 | 2.25126  | -0.05178 | O                            | 0.32077  | 2.33819  | -0.30869 |
| H                            | -1.35288 | 2.19644  | -0.06251 | H                            | 0.49944  | 2.74691  | 0.54270  |
| TC-TT = -464.8724456 Hartree |          |          |          | TT-GT = -464.8693153 Hartree |          |          |          |
| C                            | 1.73367  | -1.34394 | -0.03978 | C                            | 1.59811  | -1.37595 | -0.13998 |
| C                            | 0.35279  | -1.50792 | -0.04329 | C                            | 0.21390  | -1.37992 | -0.23438 |

|   |          |          |          |   |          |          |          |
|---|----------|----------|----------|---|----------|----------|----------|
| C | -0.52946 | -0.42565 | -0.02128 | C | -0.57374 | -0.22215 | -0.17636 |
| C | 0.05084  | 0.85027  | -0.00581 | C | 0.14272  | 0.97936  | -0.04256 |
| C | 1.42947  | 1.02012  | 0.00738  | C | 1.53531  | 0.98797  | 0.06592  |
| C | 2.29828  | -0.07099 | -0.00893 | C | 2.28918  | -0.17768 | 0.02554  |
| H | 2.37446  | -2.21607 | -0.05767 | H | 2.13982  | -2.31104 | -0.19578 |
| H | -0.05737 | -2.50996 | -0.06091 | H | -0.27525 | -2.33293 | -0.36788 |
| H | 1.81461  | 2.03131  | 0.03651  | H | 2.03690  | 1.94442  | 0.17536  |
| C | 3.79241  | 0.13056  | 0.02847  | C | 3.78853  | -0.14369 | 0.17622  |
| H | 4.10567  | 0.91834  | -0.65748 | H | 4.20425  | 0.80293  | -0.16839 |
| H | 4.12513  | 0.42063  | 1.02768  | H | 4.08018  | -0.26823 | 1.22184  |
| H | 4.32098  | -0.78234 | -0.24253 | H | 4.26010  | -0.94632 | -0.39024 |
| C | -2.03000 | -0.67728 | 0.00070  | C | -2.09895 | -0.35366 | -0.33452 |
| H | -2.14430 | -1.76353 | -0.03552 | H | -2.28126 | -0.51270 | -1.40371 |
| C | -2.76296 | -0.12111 | -1.23228 | C | -2.94462 | 0.86105  | 0.08272  |
| H | -3.79489 | -0.47563 | -1.24761 | H | -4.00032 | 0.60565  | -0.01878 |
| H | -2.79783 | 0.96820  | -1.22329 | H | -2.76575 | 1.13188  | 1.12386  |
| H | -2.28446 | -0.44324 | -2.15773 | H | -2.74761 | 1.73667  | -0.52596 |
| C | -2.68715 | -0.19905 | 1.30701  | C | -2.64681 | -1.59121 | 0.40413  |
| H | -3.74386 | -0.47250 | 1.32092  | H | -3.72532 | -1.65673 | 0.25818  |
| H | -2.20988 | -0.65740 | 2.17345  | H | -2.21890 | -2.52794 | 0.05411  |
| H | -2.61161 | 0.88176  | 1.41162  | H | -2.45687 | -1.51527 | 1.47629  |
| O | -0.74257 | 1.99555  | 0.06733  | O | -0.52392 | 2.18202  | -0.03364 |
| H | -0.99496 | 2.27115  | -0.81808 | H | 0.11961  | 2.88874  | 0.06981  |

### 3.2 – Carvacrol

Optimized Structures:

| CC = -464.8800487 Hartree |          |          |          | CT = -464.8805402 Hartree |          |          |          |
|---------------------------|----------|----------|----------|---------------------------|----------|----------|----------|
| C                         | 0.35224  | -1.95355 | 0.00000  | C                         | 0.35895  | -1.96465 | 0.00000  |
| C                         | -0.92437 | -1.38226 | 0.00000  | C                         | -0.91603 | -1.39136 | 0.00000  |
| C                         | -1.09631 | -0.00088 | 0.00000  | C                         | -1.08736 | -0.00982 | 0.00000  |
| C                         | -0.00302 | 0.86021  | 0.00000  | C                         | 0.00598  | 0.85560  | 0.00000  |
| C                         | 1.27707  | 0.29828  | 0.00000  | C                         | 1.28215  | 0.29136  | 0.00000  |
| C                         | 1.44032  | -1.08042 | 0.00000  | C                         | 1.44335  | -1.09010 | 0.00000  |
| C                         | -0.21505 | 2.36587  | 0.00000  | C                         | -0.20761 | 2.36109  | 0.00000  |
| C                         | 0.35224  | 3.02585  | 1.26742  | C                         | 0.35895  | 3.02192  | 1.26731  |
| C                         | 0.35224  | 3.02585  | -1.26742 | C                         | 0.35895  | 3.02192  | -1.26731 |
| C                         | 0.53381  | -3.44991 | 0.00000  | C                         | 0.52829  | -3.45966 | 0.00000  |
| O                         | -2.06531 | -2.14558 | 0.00000  | O                         | -1.98705 | -2.25218 | 0.00000  |
| H                         | -2.10585 | 0.38829  | 0.00000  | H                         | -2.09301 | 0.39775  | 0.00000  |
| H                         | 2.15250  | 0.93306  | 0.00000  | H                         | 2.15863  | 0.92480  | 0.00000  |
| H                         | 2.43995  | -1.49690 | 0.00000  | H                         | 2.44294  | -1.50647 | 0.00000  |
| H                         | -1.29490 | 2.53273  | 0.00000  | H                         | -1.28787 | 2.52833  | 0.00000  |
| H                         | 0.13132  | 4.09453  | 1.27502  | H                         | 0.13757  | 4.09052  | 1.27484  |
| H                         | -0.07560 | 2.58375  | 2.16728  | H                         | -0.06786 | 2.57949  | 2.16751  |

|                          |          |          |          |                           |          |          |          |
|--------------------------|----------|----------|----------|---------------------------|----------|----------|----------|
| H                        | 1.43579  | 2.91058  | 1.32245  | H                         | 1.44242  | 2.90686  | 1.32183  |
| H                        | -0.07560 | 2.58375  | -2.16728 | H                         | -0.06786 | 2.57949  | -2.16751 |
| H                        | 0.13132  | 4.09453  | -1.27502 | H                         | 0.13757  | 4.09052  | -1.27484 |
| H                        | 1.43579  | 2.91058  | -1.32245 | H                         | 1.44242  | 2.90686  | -1.32183 |
| H                        | 0.08805  | -3.91861 | -0.88271 | H                         | 0.05922  | -3.91280 | -0.87500 |
| H                        | 1.59074  | -3.70886 | 0.00000  | H                         | 1.58360  | -3.72728 | 0.00000  |
| H                        | 0.08805  | -3.91861 | 0.88271  | H                         | 0.05922  | -3.91280 | 0.87500  |
| H                        | -1.83405 | -3.07838 | 0.00000  | H                         | -2.80420 | -1.74558 | 0.00000  |
| TC = -464.880176 Hartree |          |          |          | TT = -464.8806328 Hartree |          |          |          |
| C                        | 1.22603  | -1.60196 | 0.00000  | C                         | 1.22644  | -1.61758 | 0.00000  |
| C                        | 1.47734  | -0.22335 | 0.00000  | C                         | 1.47998  | -0.24001 | 0.00000  |
| C                        | 0.43968  | 0.70057  | 0.00000  | C                         | 0.44527  | 0.68751  | 0.00000  |
| C                        | -0.89118 | 0.28464  | 0.00000  | C                         | -0.89062 | 0.27835  | 0.00000  |
| C                        | -1.15073 | -1.08615 | 0.00000  | C                         | -1.15086 | -1.08971 | 0.00000  |
| C                        | -0.10693 | -2.00512 | 0.00000  | C                         | -0.10698 | -2.01230 | 0.00000  |
| C                        | -2.03074 | 1.29093  | 0.00000  | C                         | -2.02644 | 1.28874  | 0.00000  |
| C                        | -2.03074 | 2.16134  | 1.26733  | C                         | -2.02640 | 2.15915  | 1.26739  |
| C                        | -2.03074 | 2.16134  | -1.26733 | C                         | -2.02640 | 2.15915  | -1.26739 |
| C                        | 2.35840  | -2.59670 | 0.00000  | C                         | 2.36144  | -2.60504 | 0.00000  |
| O                        | 2.75404  | 0.28198  | 0.00000  | O                         | 2.79859  | 0.14684  | 0.00000  |
| H                        | 0.69969  | 1.75028  | 0.00000  | H                         | 0.69147  | 1.74367  | 0.00000  |
| H                        | -2.17369 | -1.43882 | 0.00000  | H                         | -2.17460 | -1.44032 | 0.00000  |
| H                        | -0.33095 | -3.06454 | 0.00000  | H                         | -0.33474 | -3.07084 | 0.00000  |
| H                        | -2.95815 | 0.71293  | 0.00000  | H                         | -2.95472 | 0.71244  | 0.00000  |
| H                        | -2.89482 | 2.82783  | 1.27500  | H                         | -2.89055 | 2.82550  | 1.27573  |
| H                        | -2.06670 | 1.54739  | 2.16736  | H                         | -2.06135 | 1.54508  | 2.16725  |
| H                        | -1.13390 | 2.78029  | 1.32214  | H                         | -1.13031 | 2.77969  | 1.32243  |
| H                        | -2.06670 | 1.54739  | -2.16736 | H                         | -2.06135 | 1.54508  | -2.16725 |
| H                        | -2.89482 | 2.82783  | -1.27500 | H                         | -2.89055 | 2.82550  | -1.27573 |
| H                        | -1.13390 | 2.78029  | -1.32214 | H                         | -1.13031 | 2.77969  | -1.32243 |
| H                        | 2.99689  | -2.49341 | 0.88273  | H                         | 3.00073  | -2.47563 | 0.87494  |
| H                        | 1.97508  | -3.61512 | 0.00000  | H                         | 1.98292  | -3.62583 | 0.00000  |
| H                        | 2.99689  | -2.49341 | -0.88273 | H                         | 3.00073  | -2.47563 | -0.87494 |
| H                        | 3.39044  | -0.43809 | 0.00000  | H                         | 2.85013  | 1.10690  | 0.00000  |

Transition States:

|                              |          |          |          |                              |          |          |          |
|------------------------------|----------|----------|----------|------------------------------|----------|----------|----------|
| CC-TC = -464.8764373 Hartree |          |          |          | CT-CC = -464.8747712 Hartree |          |          |          |
| C                            | 1.95711  | -0.50220 | 0.02868  | C                            | 1.91215  | -0.55671 | -0.00068 |
| C                            | 1.38967  | 0.77458  | -0.03138 | C                            | 1.47284  | 0.76880  | -0.00746 |
| C                            | 0.01445  | 0.95373  | -0.13299 | C                            | 0.11875  | 1.08396  | -0.01280 |
| C                            | -0.85966 | -0.13294 | -0.17974 | C                            | -0.85654 | 0.08790  | 0.00327  |
| C                            | -0.29617 | -1.41227 | -0.12023 | C                            | -0.42442 | -1.24008 | 0.01755  |
| C                            | 1.07915  | -1.58227 | -0.01903 | C                            | 0.93013  | -1.54892 | 0.01327  |
| C                            | -2.36758 | 0.07305  | -0.34589 | C                            | -2.33268 | 0.45228  | -0.00392 |
| C                            | -3.20426 | -1.07741 | 0.23449  | C                            | -3.04254 | -0.05237 | -1.27099 |

|                              |          |          |          |                              |          |          |          |
|------------------------------|----------|----------|----------|------------------------------|----------|----------|----------|
| C                            | -2.86653 | 1.40911  | 0.22531  | C                            | -3.05269 | -0.03643 | 1.26355  |
| C                            | 3.44808  | -0.68916 | 0.14219  | C                            | 3.38005  | -0.89035 | -0.01167 |
| O                            | 2.15520  | 1.91429  | 0.00884  | O                            | 2.40659  | 1.79999  | -0.08529 |
| H                            | -0.34628 | 1.96996  | -0.17332 | H                            | -0.16365 | 2.12859  | -0.03934 |
| H                            | -0.92255 | -2.29014 | -0.15163 | H                            | -1.14600 | -2.04613 | 0.02638  |
| H                            | 1.48496  | -2.58524 | 0.02669  | H                            | 1.23740  | -2.58719 | 0.01744  |
| H                            | -2.55986 | 0.09509  | -1.42498 | H                            | -2.38807 | 1.54364  | -0.01114 |
| H                            | -4.26600 | -0.86938 | 0.09929  | H                            | -4.08324 | 0.27573  | -1.28453 |
| H                            | -2.99866 | -2.02965 | -0.25130 | H                            | -2.55586 | 0.32258  | -2.17137 |
| H                            | -3.01869 | -1.19714 | 1.30341  | H                            | -3.03771 | -1.14241 | -1.31916 |
| H                            | -2.41567 | 2.26868  | -0.26749 | H                            | -2.57413 | 0.35037  | 2.16342  |
| H                            | -3.94555 | 1.49066  | 0.09150  | H                            | -4.09363 | 0.29113  | 1.26416  |
| H                            | -2.65366 | 1.48307  | 1.29331  | H                            | -3.04808 | -1.12572 | 1.32611  |
| H                            | 3.85183  | -0.23386 | 1.05168  | H                            | 3.87516  | -0.55946 | 0.90409  |
| H                            | 3.70137  | -1.74698 | 0.17430  | H                            | 3.53041  | -1.96494 | -0.10140 |
| H                            | 3.98290  | -0.25603 | -0.70859 | H                            | 3.89048  | -0.39792 | -0.83941 |
| H                            | 3.08468  | 1.68062  | 0.07927  | H                            | 2.64398  | 2.09595  | 0.79808  |
| TC-TT = -464.8749094 Hartree |          |          |          | TT-CT = -464.8769209 Hartree |          |          |          |
| C                            | -1.98064 | -0.41881 | 0.00005  | C                            | 1.96738  | -0.51006 | 0.02918  |
| C                            | -1.27010 | 0.78647  | 0.01246  | C                            | 1.39916  | 0.76579  | -0.02958 |
| C                            | 0.11732  | 0.81253  | 0.01430  | C                            | 0.02384  | 0.94591  | -0.13109 |
| C                            | 0.86144  | -0.36942 | -0.01138 | C                            | -0.85542 | -0.14023 | -0.17904 |
| C                            | 0.15985  | -1.57353 | -0.03140 | C                            | -0.29080 | -1.41622 | -0.12039 |
| C                            | -1.23167 | -1.59375 | -0.02340 | C                            | 1.08706  | -1.58565 | -0.01946 |
| C                            | 2.38143  | -0.35051 | -0.00838 | C                            | -2.36296 | 0.06746  | -0.34657 |
| C                            | 2.95269  | 0.34362  | -1.25558 | C                            | -3.20019 | -1.08087 | 0.23708  |
| C                            | 2.94634  | 0.27405  | 1.27800  | C                            | -2.86266 | 1.40482  | 0.22131  |
| C                            | -3.48573 | -0.43321 | 0.01528  | C                            | 3.45686  | -0.68604 | 0.14250  |
| O                            | -1.96871 | 1.98916  | 0.09911  | O                            | 2.26295  | 1.83379  | 0.02051  |
| H                            | 0.60403  | 1.77820  | 0.04595  | H                            | -0.35511 | 1.95872  | -0.17152 |
| H                            | 0.70512  | -2.50862 | -0.04785 | H                            | -0.91668 | -2.29450 | -0.15257 |
| H                            | -1.74907 | -2.54482 | -0.03231 | H                            | 1.49183  | -2.58899 | 0.02545  |
| H                            | 2.70733  | -1.39323 | -0.03645 | H                            | -2.55615 | 0.08702  | -1.42552 |
| H                            | 4.04237  | 0.28587  | -1.26205 | H                            | -4.26187 | -0.87423 | 0.09910  |
| H                            | 2.58233  | -0.12038 | -2.16988 | H                            | -2.99262 | -2.03450 | -0.24479 |
| H                            | 2.67726  | 1.39918  | -1.28183 | H                            | -3.01585 | -1.19648 | 1.30659  |
| H                            | 2.57257  | -0.24056 | 2.16320  | H                            | -2.41628 | 2.26421  | -0.27690 |
| H                            | 4.03612  | 0.21763  | 1.28583  | H                            | -3.94200 | 1.48461  | 0.08975  |
| H                            | 2.66814  | 1.32574  | 1.36236  | H                            | -2.64782 | 1.48328  | 1.28864  |
| H                            | -3.90197 | 0.01168  | -0.89132 | H                            | 3.84602  | -0.20831 | 1.04323  |
| H                            | -3.86041 | -1.45286 | 0.08828  | H                            | 3.71803  | -1.74248 | 0.17477  |
| H                            | -3.87756 | 0.14167  | 0.85451  | H                            | 3.97618  | -0.22934 | -0.70168 |
| H                            | -2.13967 | 2.33398  | -0.78188 | H                            | 1.76128  | 2.65280  | -0.02358 |
